# Supplementary material
Source: ML conference proceedings conference paper supplement (https://openreview.net/forum?id=OMwD6pGYB4)

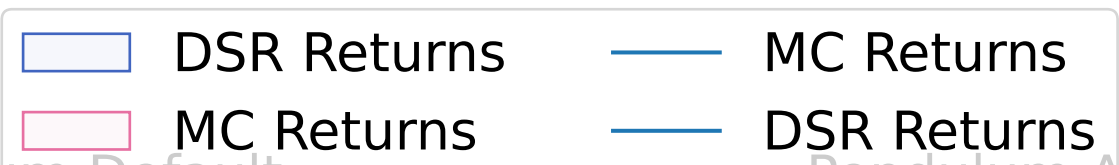

Pendulum Default

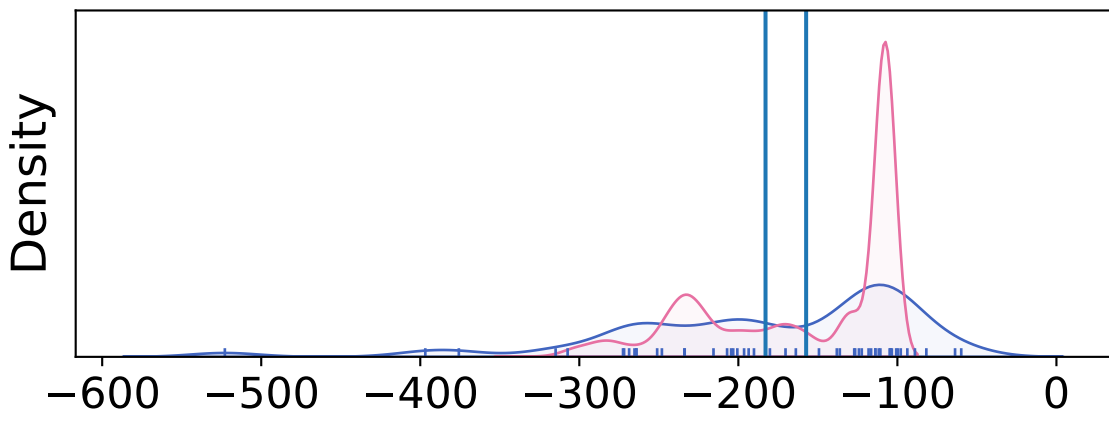

Pendulum Above Horizon

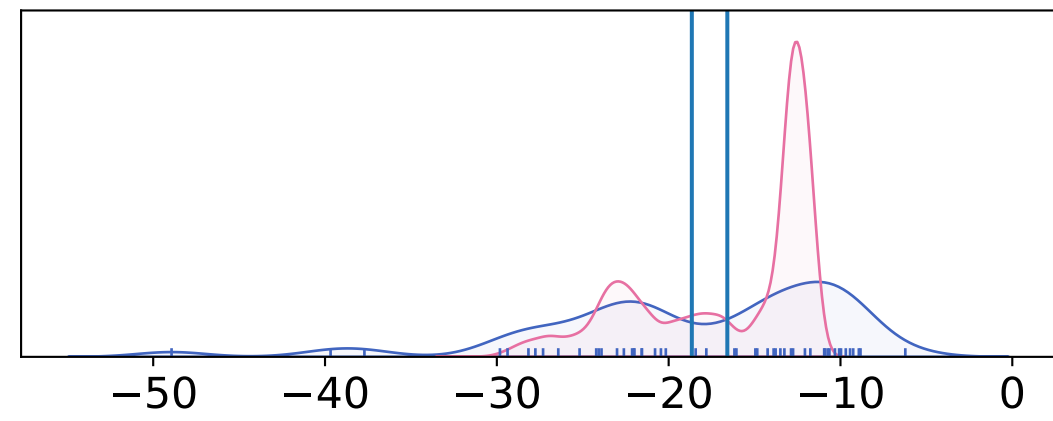

Pendulum Stay Left

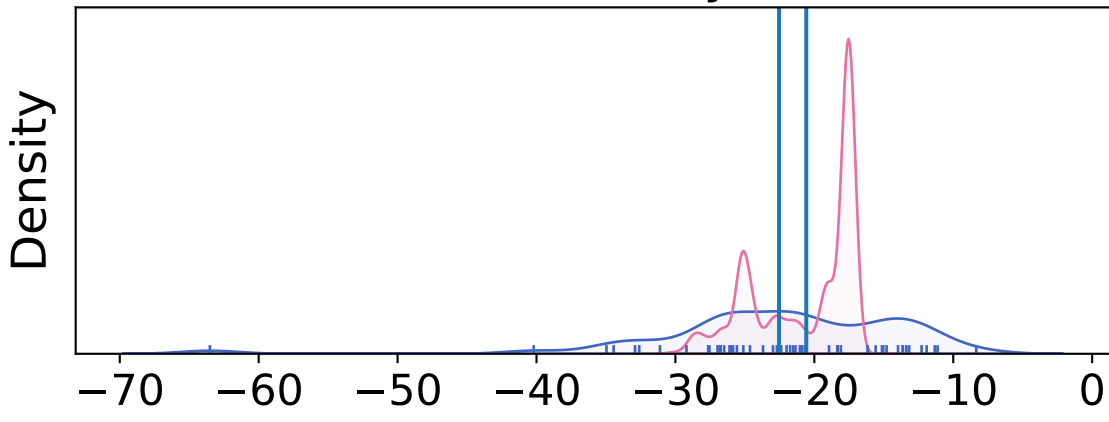

Pendulum Counterclockwise Penalty

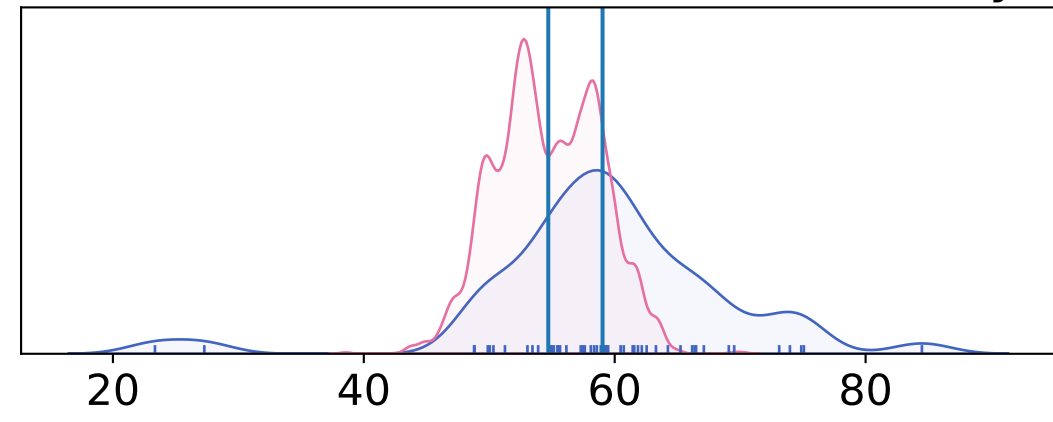

Supplement: supplementary_material [file attachment]
